# Supplementary material for: 4,4′-Bipyridine-N-monoxide. A hybrid ligand for building networks using a combination of metal–ligand and hydrogen-bonding interactions
Source: Royal Society of Chemistry journal article supplement (doi:10.1039/b703456c), 2007-01-01
Supplement: b703456c.pdf [file b703456c.pdf]

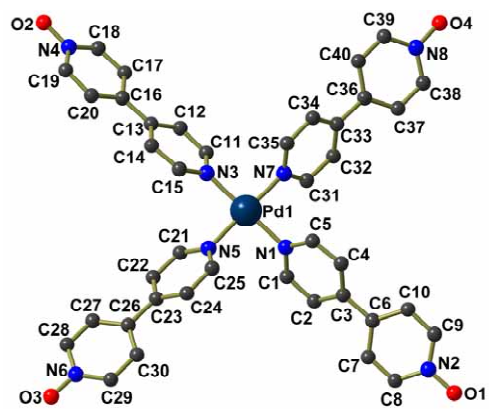

**Figure S-1:**  $[\text{Pd}(\text{BIPYMO})_4]_3[\text{OTf}]_4[\text{BF}_4]_2$

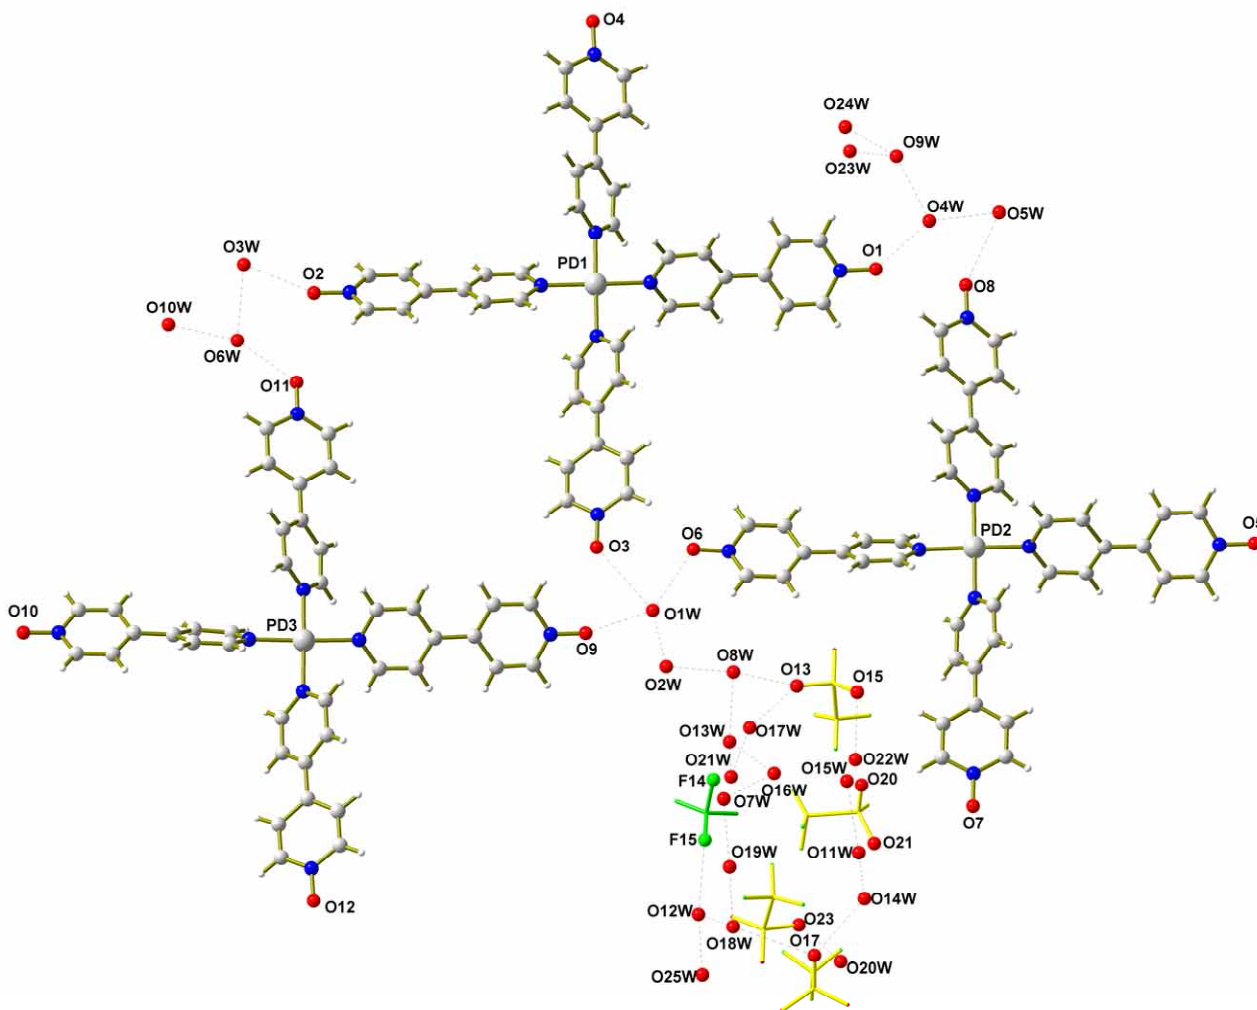

**Figure S-2:** Full packing arrangement of in-plane cations, anions and water molecules for  $[\text{Pd}(\text{BIPYMO})_4]_3[\text{OTf}]_4[\text{BF}_4]_2$

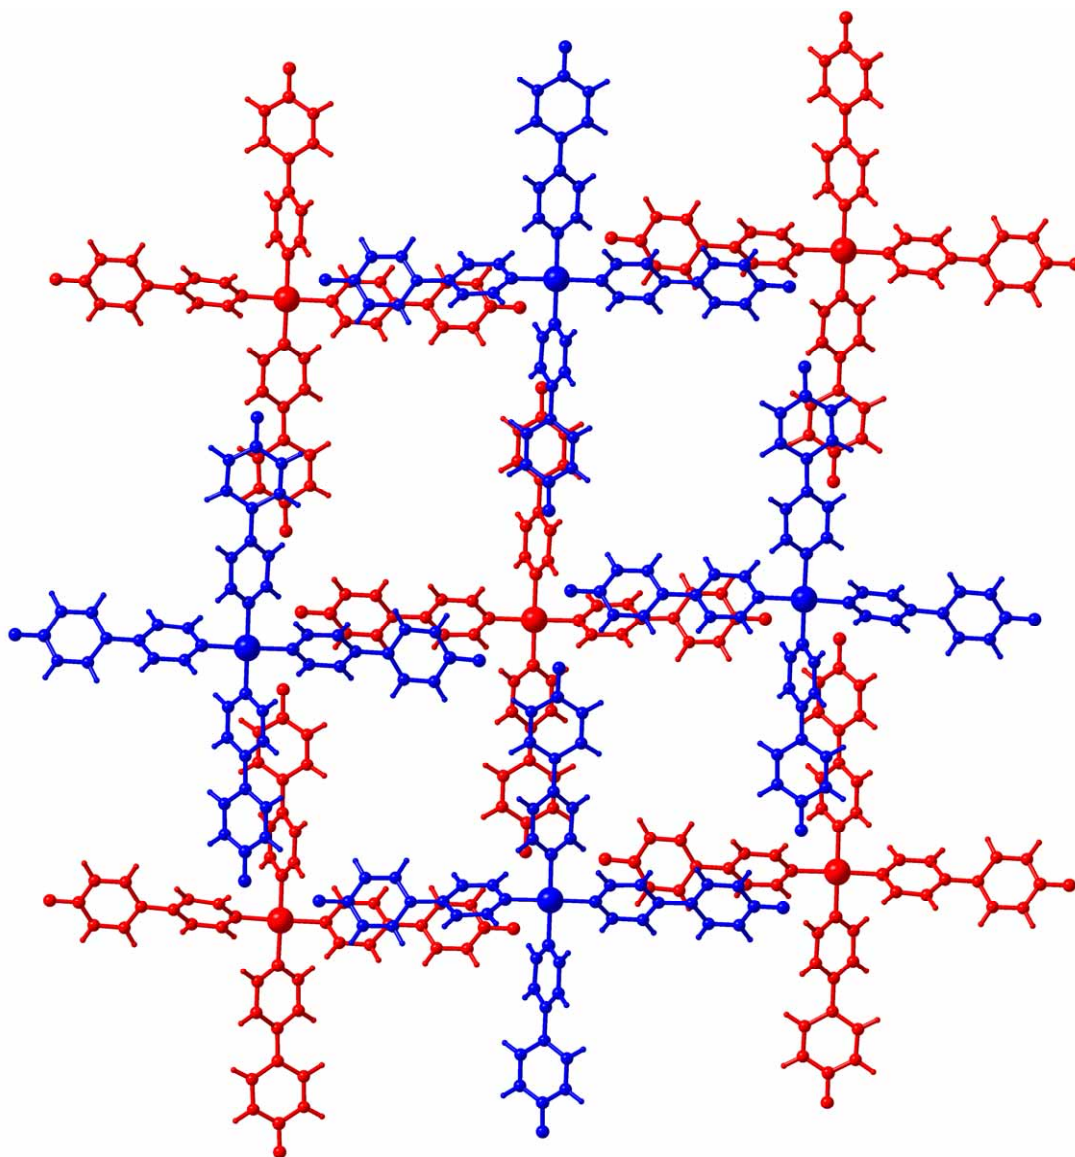

**Figure S-3:** A packing diagram for  $[\text{Pd}(\text{BIPYMO})_4]_3[\text{OTf}]_4[\text{BF}_4]_2$  showing how two layers (red and blue molecules) are organized with respect to each other.
